# Supplementary material
Source: MDPI journal article supplement (https://www.mdpi.com/2075-4701/13/6/1118)
Supplement: s1 [file s1]

# Leaching of Waste Pharmaceutical Blister Package Aluminium in Sulphuric Acid Media

Sugam Shukla \*, Alexander Chernyaev, Petteri Halli, Jari Aromaa and Mari Lundström

Department of Chemical and Metallurgical Engineering (CMET), School of Chemical Engineering, Aalto University, Vuorimiehentie 2 K, 02150 Espoo, Finland;  
alexander.chernyaev@aalto.fi (A.C.); petteri.halli@aalto.fi (P.H.); jari.aromaa@aalto.fi (J.A.);  
mari.lundstrom@aalto.fi (M.L.)

\*Correspondence: sugam.shukla@aalto.fi; Tel.: +358-404873434

**Table S1.** Leaching experiments and their respective the aluminium extraction (%).

| Experimental Set | Experiment Code | Temperature (°C) | H <sub>2</sub> SO <sub>4</sub> (M)    | S:L ratio (g/L) | Time (hours) | Aluminium Extraction (%) |
|------------------|-----------------|------------------|---------------------------------------|-----------------|--------------|--------------------------|
| PE               | PE-1            | 80               | 0.25                                  | 4.0             | 24           | 91.69                    |
|                  | PE-2            | 80               | 0.50                                  | 4.0             | 24           | 92.40                    |
|                  | PE-3            | 80               | 0.75                                  | 4.0             | 24           | 91.33                    |
|                  | PE-4            | 80               | 1.00                                  | 4.0             | 24           | 91.40                    |
| Experimental Set | Experiment Code | Temperature (°C) | H <sub>2</sub> O <sub>2</sub> (vol-%) | S:L ratio (g/L) | Time (hours) | Aluminium Extraction (%) |
| T1               | A1*             | 40               | 0                                     | 4.5             | 24           | 40.96                    |
|                  | A2*             | 60               | 0                                     | 4.5             | 24           | 91.91                    |
|                  | A3*#            | 80               | 0                                     | 4.5             | 24           | 100.00                   |
|                  | A4*             | 40               | 1.25                                  | 4.5             | 24           | 80.80                    |
|                  | A5*             | 60               | 1.25                                  | 4.5             | 24           | 100.00                   |
|                  | A6*#            | 80               | 1.25                                  | 4.5             | 24           | 100.00                   |
|                  | A7*             | 40               | 2.5                                   | 4.5             | 24           | 71.30                    |
|                  | A8*             | 60               | 2.5                                   | 4.5             | 24           | 100.00                   |
|                  | A9*#            | 80               | 2.5                                   | 4.5             | 24           | 100.00                   |
| T2               | A10             | 60               | 1.25                                  | 4.5             | 24           | 100.00                   |
|                  | A11             | 60               | 1.25                                  | 4.5             | 24           | 100.00                   |
|                  | A12             | 60               | 1.25                                  | 4.5             | 24           | 100.00                   |
| T3               | A13             | 50               | 0                                     | 4.5             | 5            | 8.04                     |
|                  | A14             | 70               | 0                                     | 4.5             | 5            | 37.20                    |
|                  | A15             | 50               | 1.25                                  | 4.5             | 5            | 25.81                    |
|                  | A16             | 70               | 1.25                                  | 4.5             | 5            | 87.30                    |
|                  | A17             | 40               | 0.625                                 | 4.5             | 5            | 10.80                    |
|                  | A18             | 60               | 0.625                                 | 4.5             | 5            | 56.50                    |
|                  | A19             | 40               | 1.875                                 | 4.5             | 5            | 11.77                    |
|                  | A20             | 60               | 1.875                                 | 4.5             | 5            | 58.64                    |

|           |     |    |      |       |   |       |
|-----------|-----|----|------|-------|---|-------|
| <b>T4</b> | A21 | 60 | 1.25 | 2.25  | 5 | 52.49 |
|           | A22 | 60 | 1.25 | 3.375 | 5 | 45.64 |
|           | A23 | 60 | 1.25 | 5.625 | 5 | 41.45 |
|           | A24 | 60 | 1.25 | 6.75  | 5 | 36.85 |
|           | A25 | 80 | 1.25 | 2.25  | 5 | 95.48 |
|           | A26 | 80 | 1.25 | 3.375 | 5 | 91.36 |
|           | A27 | 80 | 1.25 | 5.625 | 5 | 89.02 |
|           | A28 | 80 | 1.25 | 6.75  | 5 | 80.83 |

**Table S2.** Central composite design and the response for the dissolution experiments

| Experimental Code | Coded Values |                                  | Uncoded Values   |                                       | Response      |
|-------------------|--------------|----------------------------------|------------------|---------------------------------------|---------------|
|                   | [T]          | [H <sub>2</sub> O <sub>2</sub> ] | Temperature (°C) | H <sub>2</sub> O <sub>2</sub> (vol-%) | Rate Constant |
| A1                | -1           | -1                               | 40               | 0                                     | 0.00518       |
| A2                | 0            | -1                               | 60               | 0                                     | 0.01674       |
| A3                | +1           | -1                               | 80               | 0                                     | 0.06324       |
| A4                | -1           | 0                                | 40               | 1.25                                  | 0.00953       |
| A5                | 0            | 0                                | 60               | 1.25                                  | 0.04799       |
| A6                | +1           | 0                                | 80               | 1.25                                  | 0.18135       |
| A7                | -1           | +1                               | 40               | 2.5                                   | 0.00876       |
| A8                | 0            | +1                               | 60               | 2.5                                   | 0.04311       |
| A9                | +1           | +1                               | 80               | 2.5                                   | 0.17393       |
| A10               | 0            | 0                                | 60               | 1.25                                  | 0.04171       |
| A11               | 0            | 0                                | 60               | 1.25                                  | 0.04185       |
| A12               | 0            | 0                                | 60               | 1.25                                  | 0.04162       |

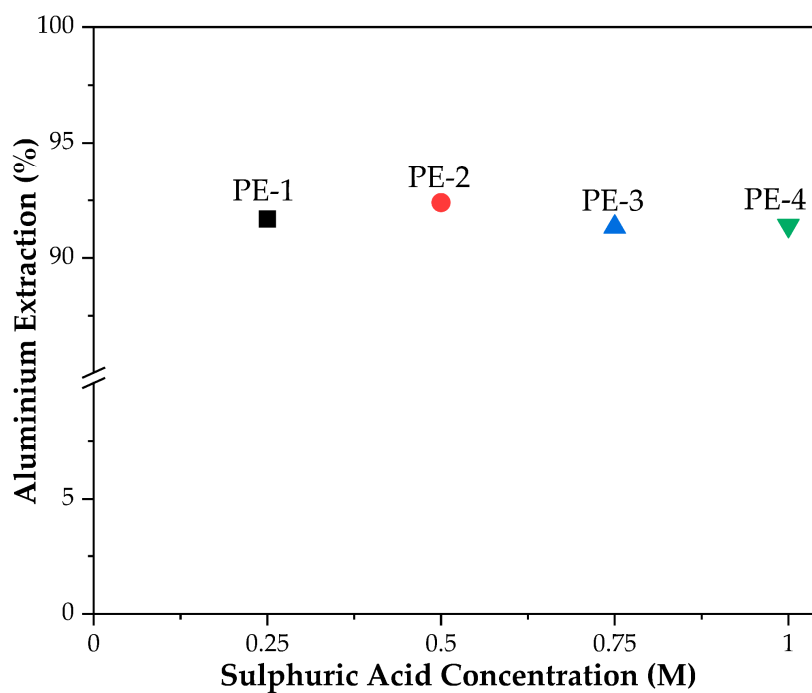

**Figure S1.** Aluminium extraction for preliminary experiments (experiments PE-1–PE-4) as a function of sulphuric acid concentration (0.25 – 1.0 M)

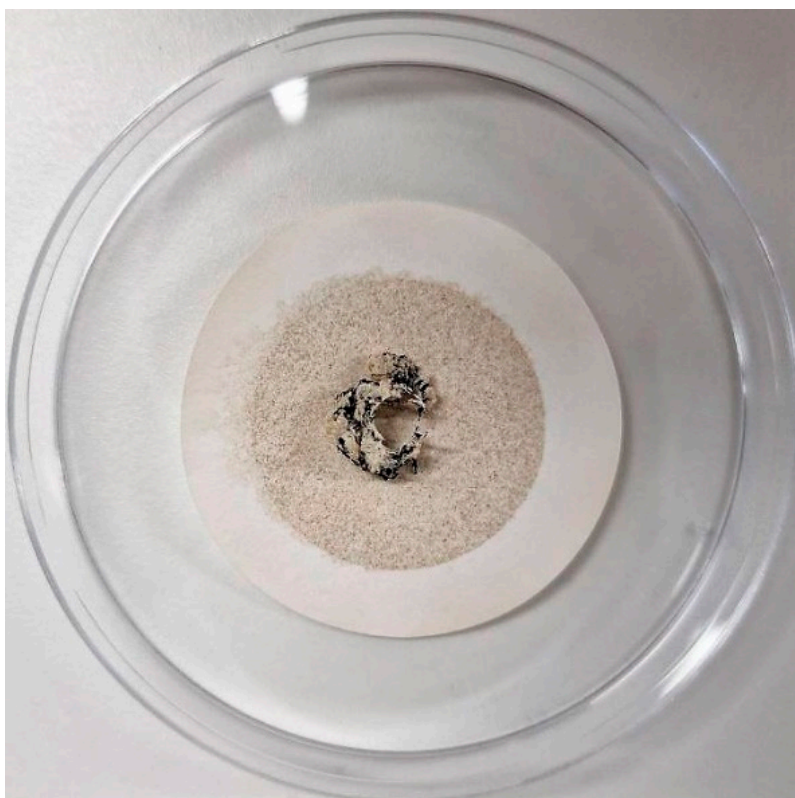

**Figure S2.** Filtration residue after leaching experiment when total aluminium extraction was achieved

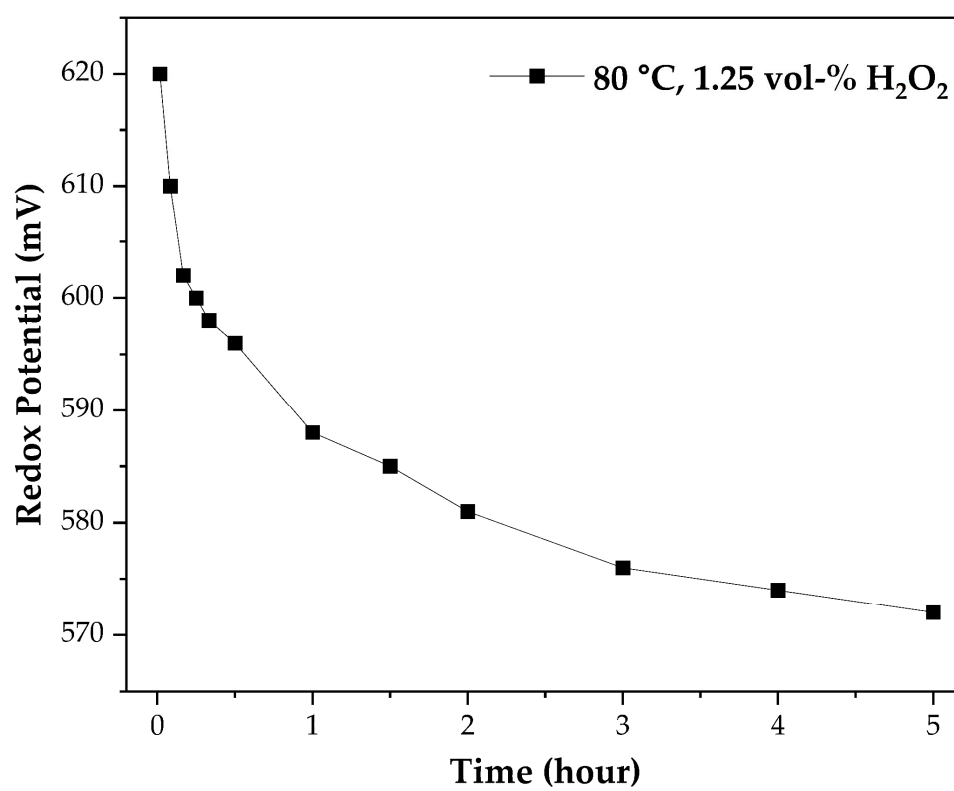

**Figure S3.** Redox Potential (mV) versus time for leaching system of 1.25 vol-%  $\text{H}_2\text{O}_2$  in 0.25 M  $\text{H}_2\text{SO}_4$

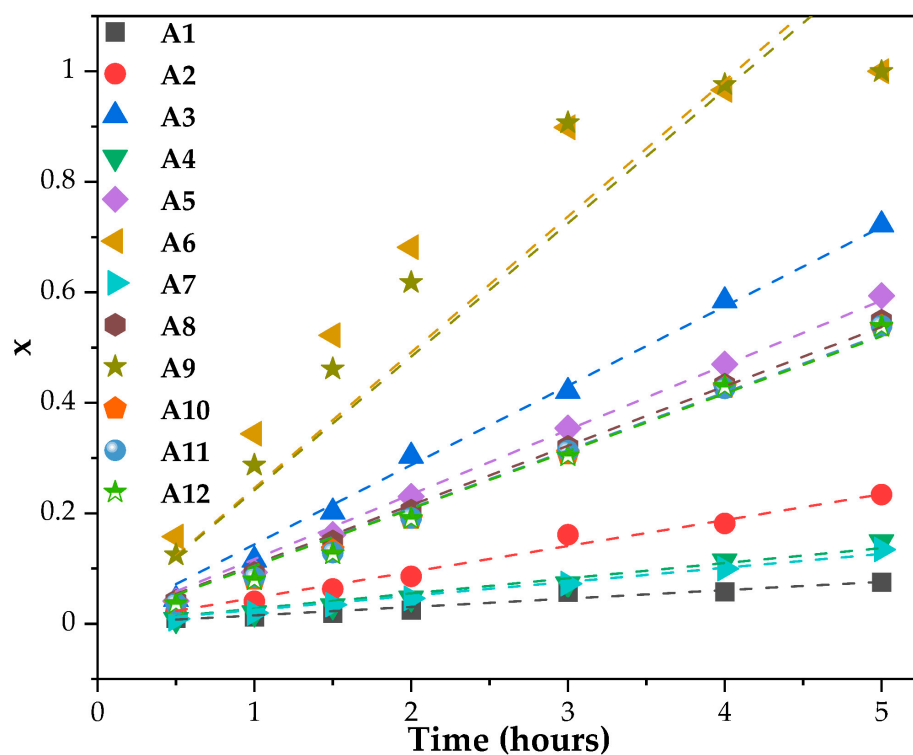

**Figure S4.** Film diffusion control model fitted for all the leaching experiments (A1-A12) according to first  $t = 5$  h ( $R^2 = 0.98$ – $0.99$ , excluding A6 and A9)

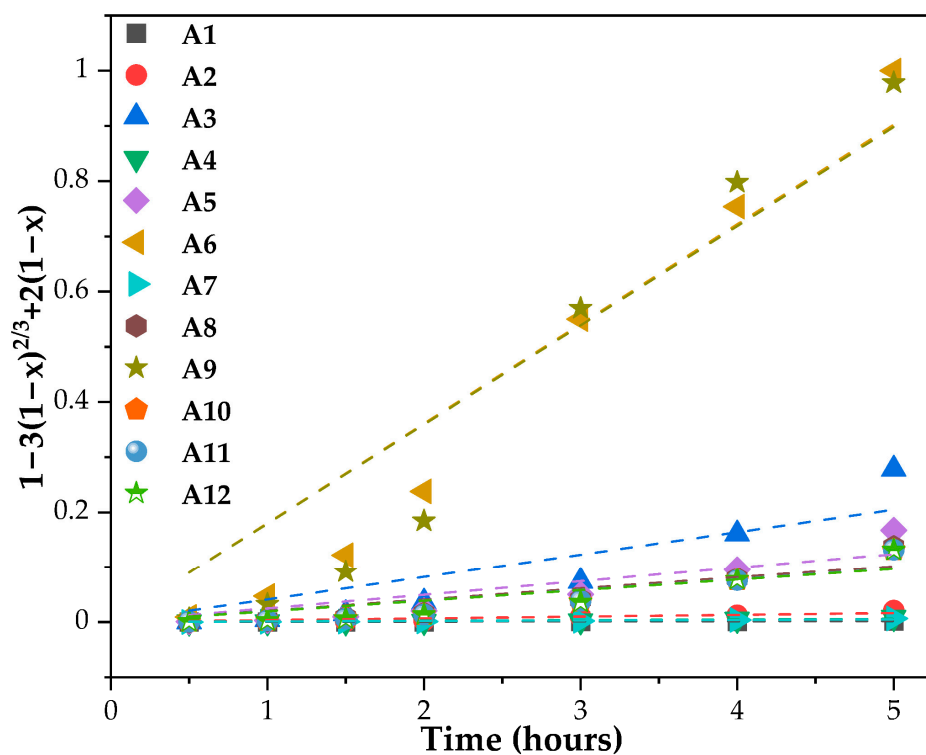

**Figure S5.** Product layer diffusion control model fitted for all the leaching experiments (A1-A12) according to first  $t = 5$  h ( $R^2 = 0.85$ – $0.97$ )

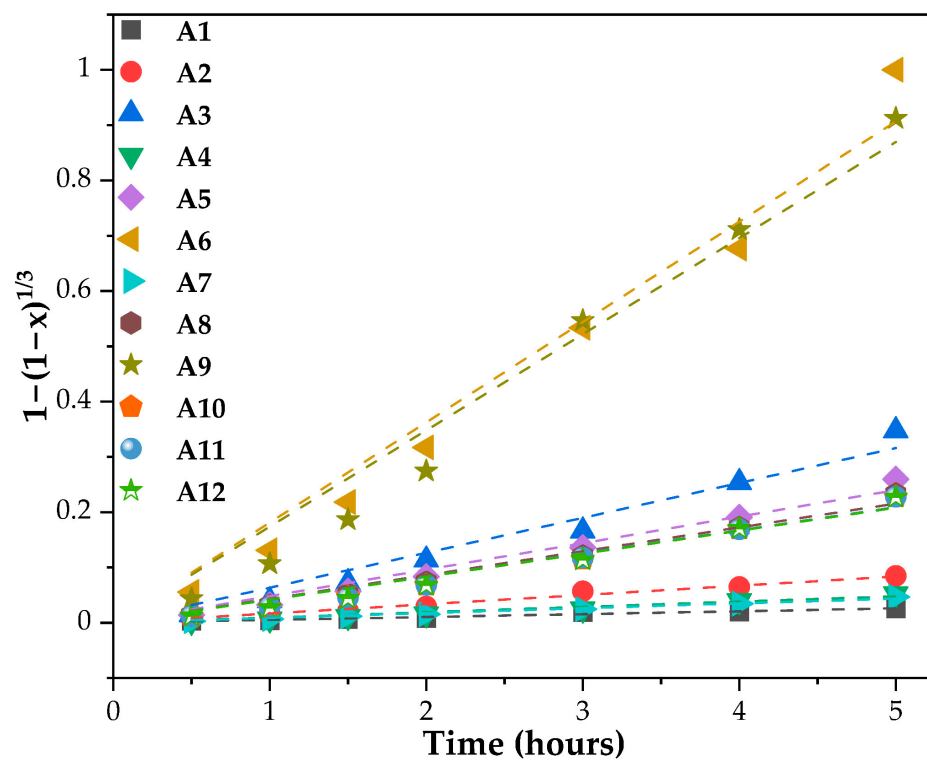

**Figure S6.** Chemical reaction control model fitted for all the leaching experiments (A1-A12) according to first  $t = 5$  h ( $R^2 = 0.98-0.99$ )
